# Supplementary material for: Stabilizing a Li1.3Al0.3Ti1.7(PO4)3/Li metal anode interface in solid-state batteries with a LiF/Cu-rich multifunctional interlayer
Source: Royal Society of Chemistry journal article supplement (doi:10.1039/d3sc06347j), 2024-01-01
Supplement: d3sc06347j1.pdf [file d3sc06347j1.pdf]

## Supporting Information

### Stabilizing $\text{Li}_{1.3}\text{Al}_{0.3}\text{Ti}_{1.7}(\text{PO}_4)_3/\text{Li}$ metal anode interface in solid-state batteries by LiF/Cu-rich multifunctional interlayer

#### 1. Experimental Section

##### 1.1 Preparation of LAMP

$\text{Li}_{1.3}\text{Al}_{0.3}\text{Ti}_{1.7}(\text{PO}_4)_3$  (LAMP) solid electrolyte was prepared by a traditional solid-state sintering method through weighing of  $\text{Li}_2\text{CO}_3$  (99%, Aladdin),  $\text{Al}_2\text{O}_3$  (99.99%, Aladdin),  $\text{TiO}_2$  (99.8%, Aladdin) and  $\text{NH}_4\text{H}_2\text{PO}_4$  (99%, Merck) according to stoichiometric ratio. An excess of 10 wt%  $\text{Li}_2\text{CO}_3$  was added to compensate for the loss of lithium during the sintering process. After grinding at 400 rpm for 9 h, the mixture was calcined at 900 °C in air for 2 h to obtain the LAMP powder. In order to reduce the particle size, the LAMP powder was ball milled at 400 rpm for 9 h. The LAMP powder after ball milling was pressed at 8 MPa for 10 min. The pressed ceramic sheets were covered with LAMP powders and sintered in 850 °C air at 2 °C/min for 4 h to obtain the dense LAMP pellets.

##### 1.2 Preparation of $\text{CuF}_2$ composite layer

0.125 g polyvinylidene fluoride (PVDF, Aladdin) and 0.05 g LiTFSI ( $\text{LiC}_2\text{F}_6\text{NO}_4\text{S}_2$ , 99.9%, Aladdin) were dissolved in 4 mL 1, 2-Dimethoxyethane (DME).  $\text{CuF}_2$  powder (99.5%, Aladdin) (0.011 g, 0.025 g and 0.048 g, corresponding to 5 wt%, 10 wt% and 15 wt%  $\text{CuF}_2$ ) and  $\text{LiNO}_3$  (99.9%, Aladdin) (0.022 g, 0.050 g and 0.096 g) with a weight ratio of 1: 2 were added into the above solution and then magnetically stirred for 12 h to obtain a mixed solution. LiTFSI is used to form a polymer-salt mixture with PVDF, and also can increase ionic conductivity of the interlayer.  $\text{LiNO}_3$  was employed to

increase the solubility of  $\text{CuF}_2$  in DME solvent. A drop of  $\sim 20 \mu\text{L}$  mixed solution was coated on the surface of LATP pellets and then dried naturally for 2 h. The other side was applied in the same way to obtain  $\text{CuF}_2@\text{LATP}$ . All of the above processes were performed in the glove box. In order to investigate the effect of  $\text{CuF}_2$  layer with different thicknesses on the electrochemical performance, the  $\text{CuF}_2$  layer with different thicknesses were prepared by varying the amount of 10 wt%  $\text{CuF}_2$  solution (10  $\mu\text{L}$ , 20  $\mu\text{L}$  and 30  $\mu\text{L}$ ).

### 1.3 Characterizations

The prepared LATP pellets were characterized by X-ray diffractometer (XRD, Ultima IV, Rigaku) under 40 kV and 40 mA  $\text{Cu-K}\alpha$  radiation ( $10^\circ\sim 80^\circ$ ). Scanning electron microscopy (SEM, JSM-7500F JEOL) and energy dispersive spectrometer (EDS) were used to study the surface, cross-section morphology and element distribution of LATP pellets and lithium metal anodes. The composition and valence states have been analyzed by X-ray photoelectron spectroscopy (XPS) measurements made by PHI Quantera II, Japan.

### 1.4 Electrochemical Tests

To assemble lithium symmetric batteries, lithium foil is used as electrode,  $\text{CuF}_2@\text{LATP}$  or LATP are employed as electrolyte. To assemble the full battery, cathode material ( $\text{LiFePO}_4$  or  $\text{LiNi}_{0.8}\text{Co}_{0.1}\text{Mn}_{0.1}\text{O}_2$ ) (LFP or NCM), conductive additive (Super P), and binder (PVDF) with weight ratio of 8:1:1 were dispersed in N-methyl pyrrolidone (NMP). The obtained slurry was coated on aluminum foil, and the active material loading was  $1.2\text{-}1.5 \text{ mg cm}^{-2}$ . It was placed into a  $110^\circ\text{C}$  vacuum oven for 12 h. The dried coated aluminum foil was punched into small circles. LFP or NCM and Li foil were used as cathode and anode, respectively, and  $\text{CuF}_2@\text{LATP}$  or LATP was used as

solid electrolyte. To ensure good transport of  $\text{Li}^+$  across the LFP/LATP or NCM/LATP interfaces, 4  $\mu\text{L}$  of electrolyte (1 M  $\text{LiPF}_6$  in EC: DMC = 1:1) was added to the cathode side. Finally, the battery was assembled in the Ar filled glove box (MIKROUNA, Super 1220/750,  $\text{H}_2\text{O} \leq 1$  ppm,  $\text{O}_2 \leq 1$  ppm) using CR2025 configuration.

The ionic conductivity of LATP pellet, the interfacial impedance of symmetric and full batteries were measured via the AC impedance technique (CHI614C electrochemical workstation) in a frequency range from 1 M Hz to 1 Hz with an amplitude of 0.01 V. As for electronic conductivity via the chronoamperometry technique, the constant voltages of 1 V, 2 V, 3 V were applied and the response currents were detected. A silver paste was applied on the surface of LATP pellet as a blocking electrode. The Neware battery test system (CT-4008 T, 5 V/10 mA) was used to perform constant current cycling of symmetric and full batteries at different current densities. Galvanostatic charge-discharge tests for the symmetric batteries were carried out at 0.1, 0.2, and 0.3  $\text{mA cm}^{-2}$ , and each cycle was lasted for 2 h. The critical current density (CCD) of the symmetric battery was measured under Time-constant mode, under a fixed cycling period, the areal capacity of Li plating or stripping gradually increases (1 h per half-cycle). In the potential range of 2.4 - 4.2 V (LFP, 1 C = 170  $\text{mAh g}^{-1}$ ) and 2.8 - 4.3 V (NCM, 1 C = 180  $\text{mAh g}^{-1}$ ), the full batteries were charged and discharged at different current rates (0.1, 0.2, 0.5 and 1.0 C). All electrochemical measurements were performed at 25 °C.

## 2. Supplementary Figures

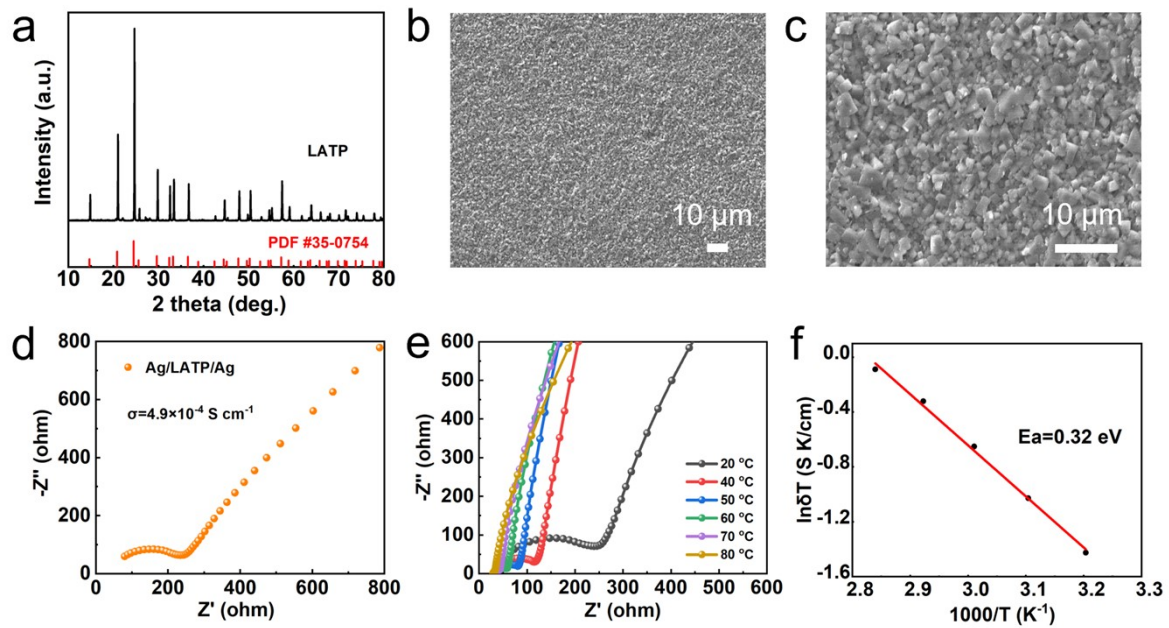

**Figure S1.** (a) XRD pattern, (b) surface and (c) cross-section SEM images of LATP pellet; (d) EIS curve of the Ag/LATP/Ag electrode; the ionic conductivity of the LATP pellet is  $4.9 \times 10^{-4}\ \text{S cm}^{-1}$ ; (e) EIS curves of the Ag/LATP/Ag electrode at different temperatures; (f) Arrhenius plots and the calculated active energy for LATP electrolyte.

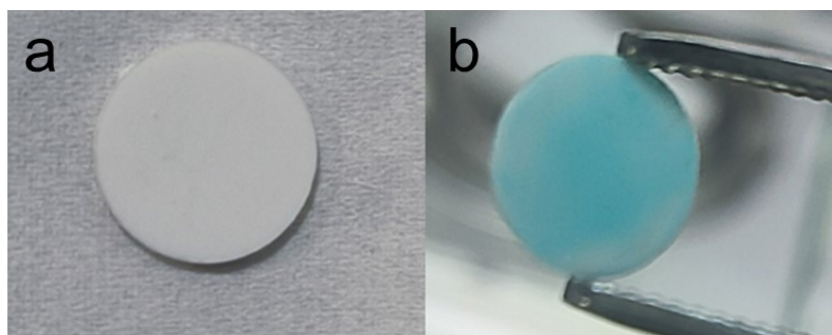

**Figure S2.** Digital photos of the (a) original LATP and (b) CuF<sub>2</sub>@LATP.

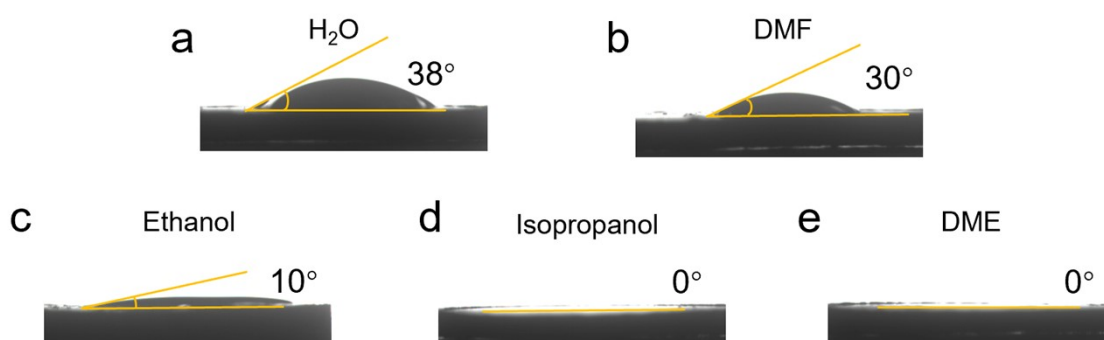

**Figure S3.** Contact angle measurements of various solution on LATP pellets. (a) H<sub>2</sub>O, (b) N, N-Dimethylformamide, (c) Ethanol, (d) Isopropanol and (e) 1, 2-Dimethoxyethane.

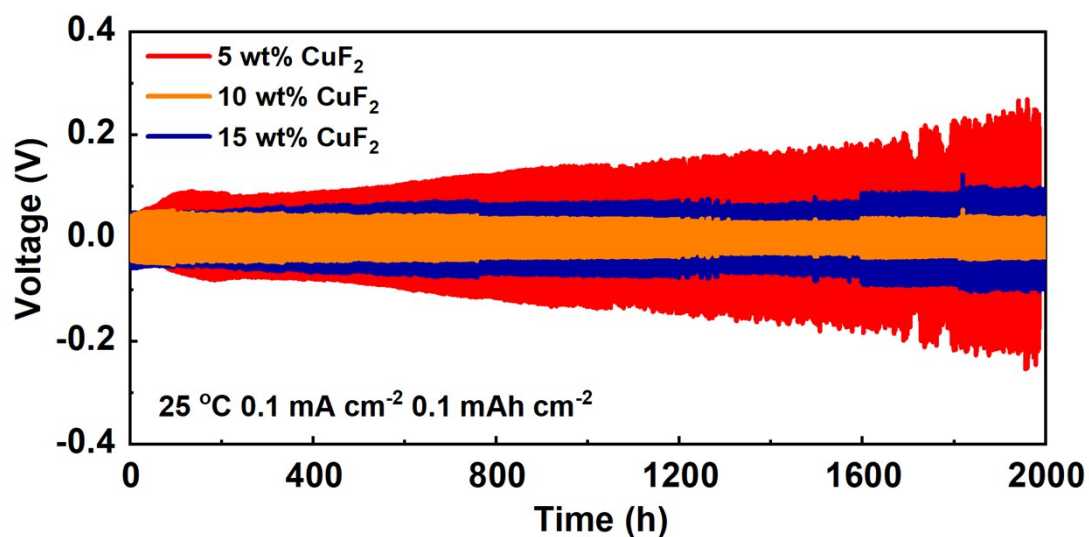

**Figure S4.** Voltage-time curves of LATP symmetric batteries assembled with different mass ratios of  $\text{CuF}_2$  at  $0.1 \text{ mA cm}^{-2}/0.1 \text{ mAh cm}^{-2}$ .

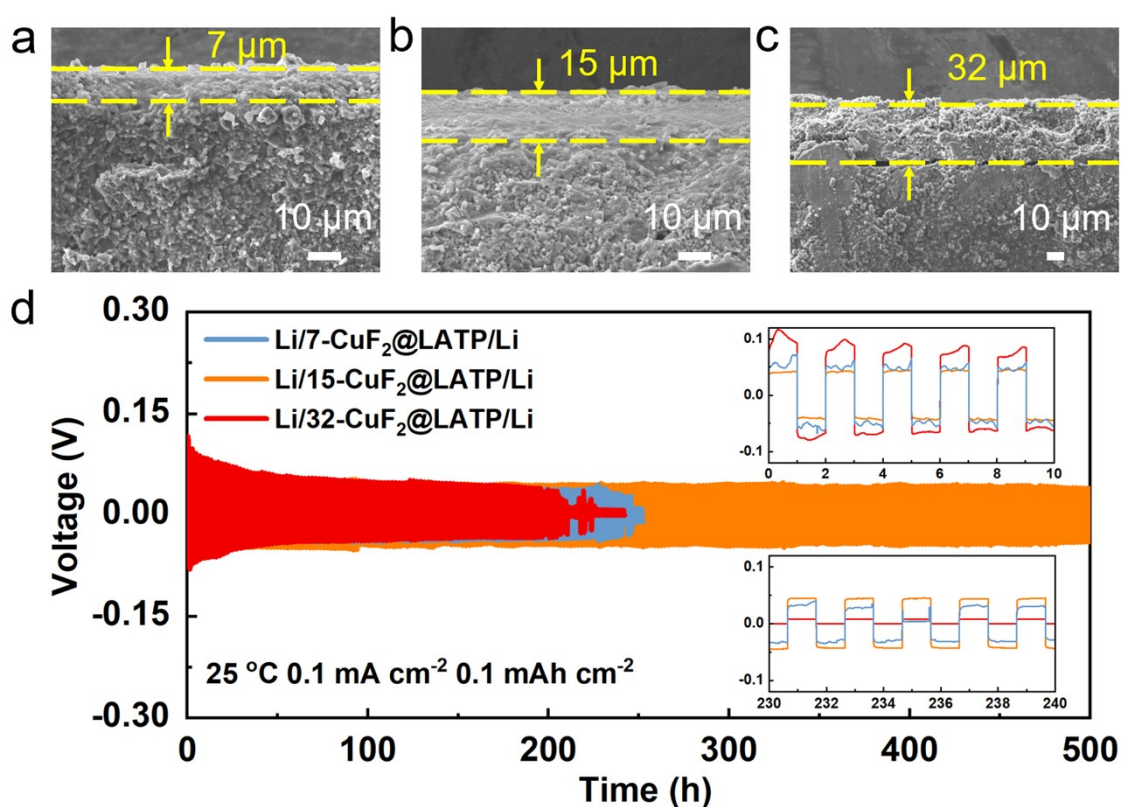

**Figure S5.** The cross-section SEM images of LATP with  $\text{CuF}_2$  composite layer with different thicknesses of (a)  $7 \mu\text{m}$ , (b)  $15 \mu\text{m}$  and (c)  $32 \mu\text{m}$ . (d) Voltage-time curves of LATP symmetric batteries assembled with different thicknesses of  $\text{CuF}_2$  composite layer at  $0.1 \text{ mA cm}^{-2}/0.1 \text{ mAh cm}^{-2}$ .

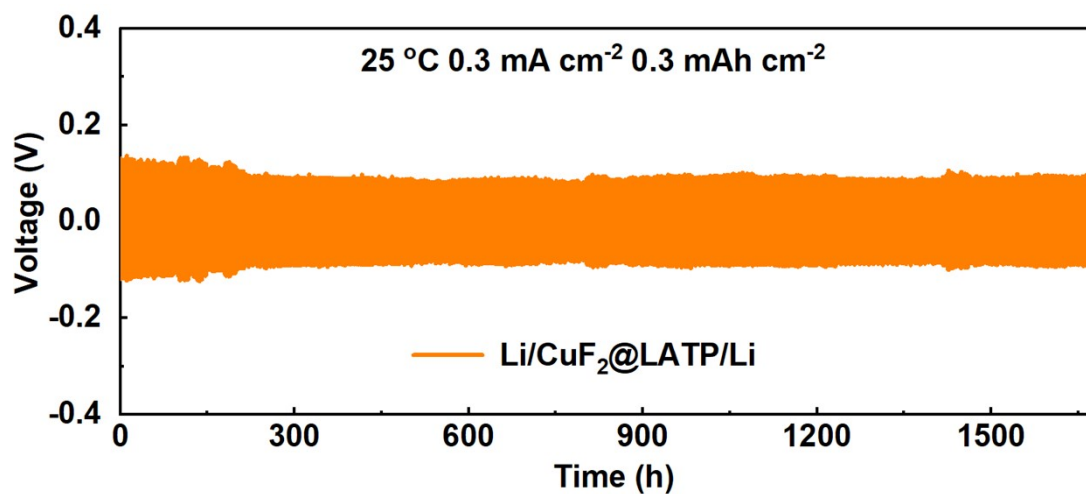

Figure S6. Voltage-time curve of Li/CuF<sub>2</sub>@LATP/Li symmetric battery at 0.3 mA cm<sup>-2</sup>/0.3 mAh cm<sup>-2</sup>.

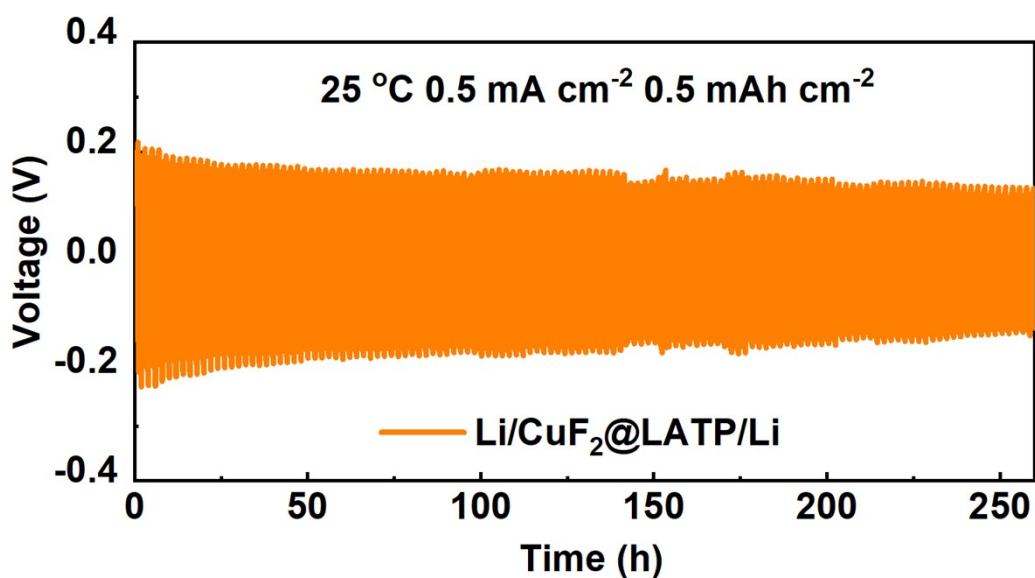

Figure S7. Voltage-time curve of Li/CuF<sub>2</sub>@LATP/Li symmetric battery at 0.5 mA cm<sup>-2</sup>/0.5 mAh cm<sup>-2</sup>.

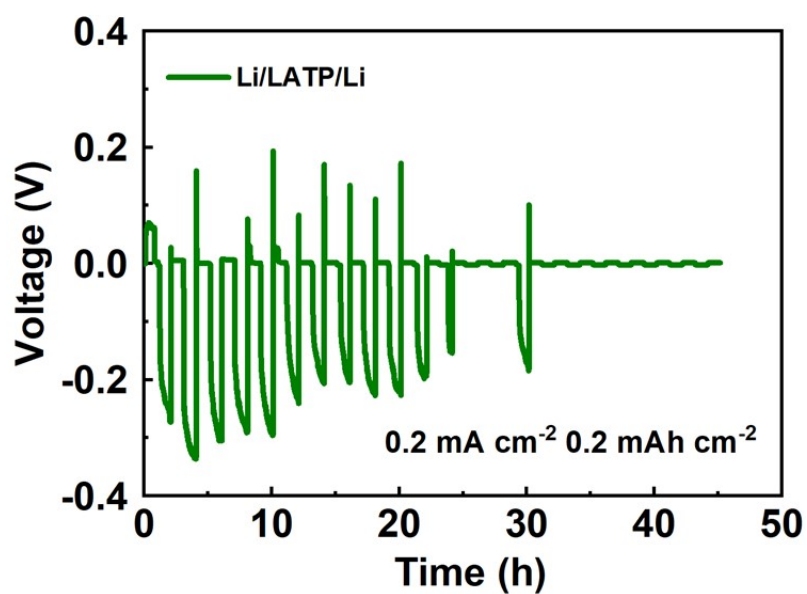

Figure S8. Voltage-time curve of Li/LATP/Li symmetric battery at 0.2 mA cm<sup>-2</sup>/0.2 mAh cm<sup>-2</sup>.

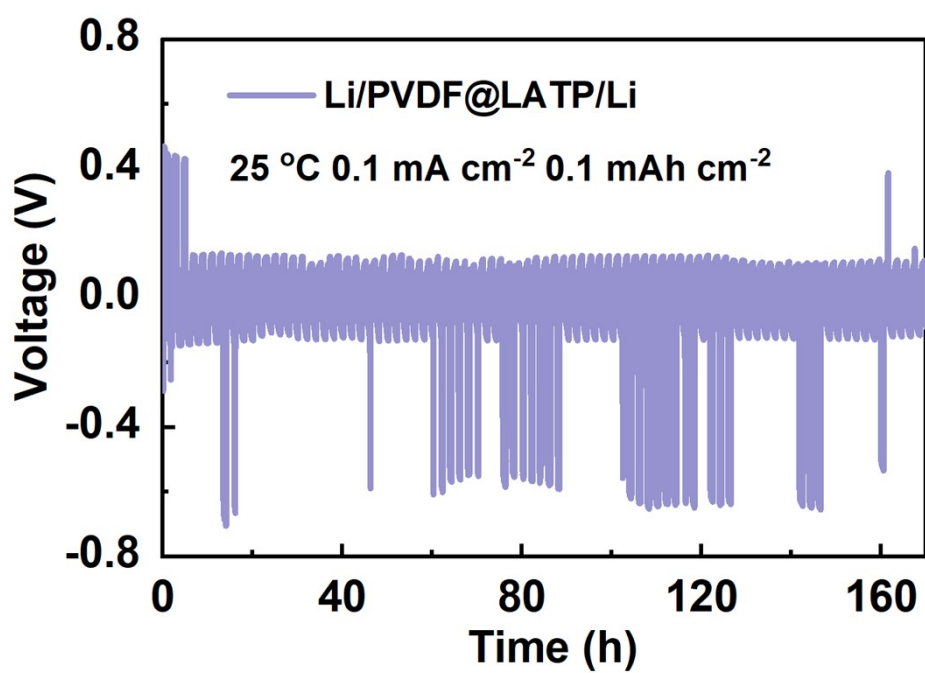

Figure S9. Voltage-time curve of Li/PVDF@LATP/Li symmetric battery at 0.1 mA cm<sup>-2</sup>/0.1 mAh cm<sup>-2</sup>.



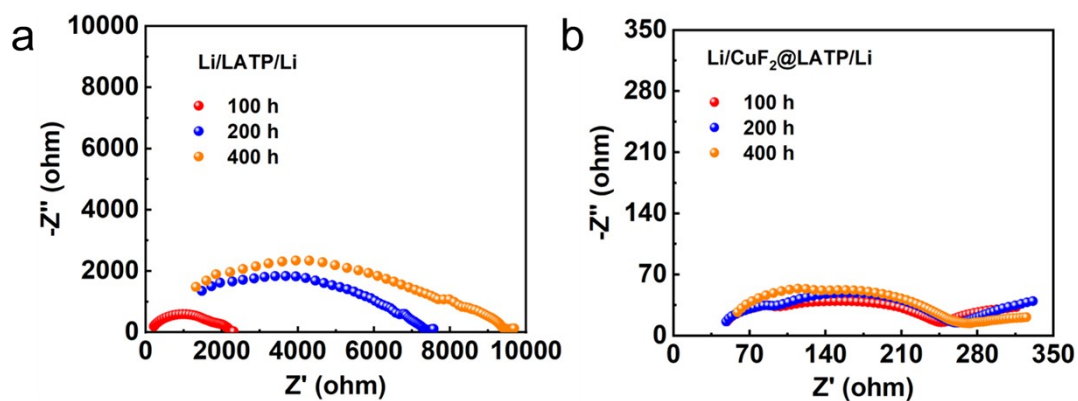

**Figure S10.** EIS curves of (a) Li/LATP/Li and (b) Li/CuF<sub>2</sub>@LATP/Li symmetrical batteries after different cycling time at 0.1 mA cm<sup>-2</sup>/0.1 mAh cm<sup>-2</sup>.

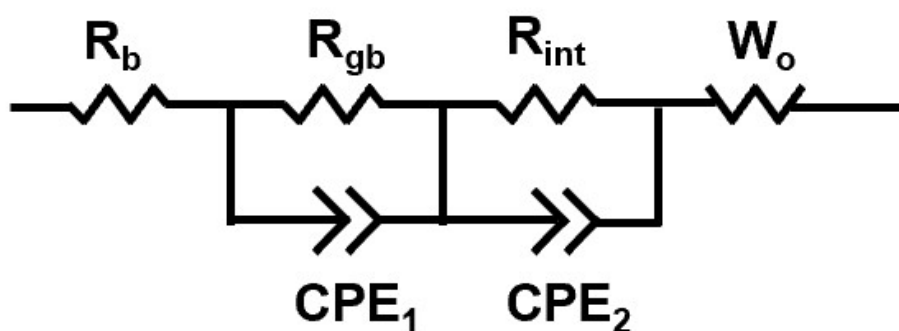

**Figure S11.** The equivalent circuit of symmetric batteries.

The equivalent circuit of a symmetrical battery, where  $R_b$  represents the total resistance of elements such as LATP, interlayer, electrode, and packaging material.  $R_{gb}$ ,  $R_{int}$ , and  $W_o$  represent the grain boundary resistance of the LATP, the interfacial resistance between Li and LATP, and the Warburg resistance, respectively.

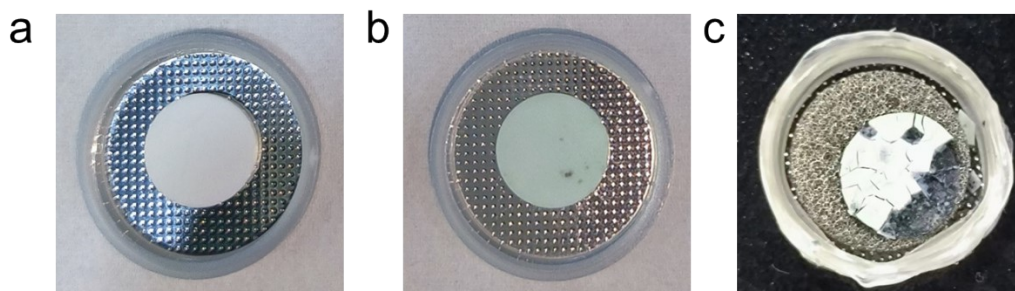

**Figure S12.** Digital photos of the (a) original LATP pellet, (b)  $\text{CuF}_2@$ LATP after 100 cycles and (c) LATP after 100 cycles.

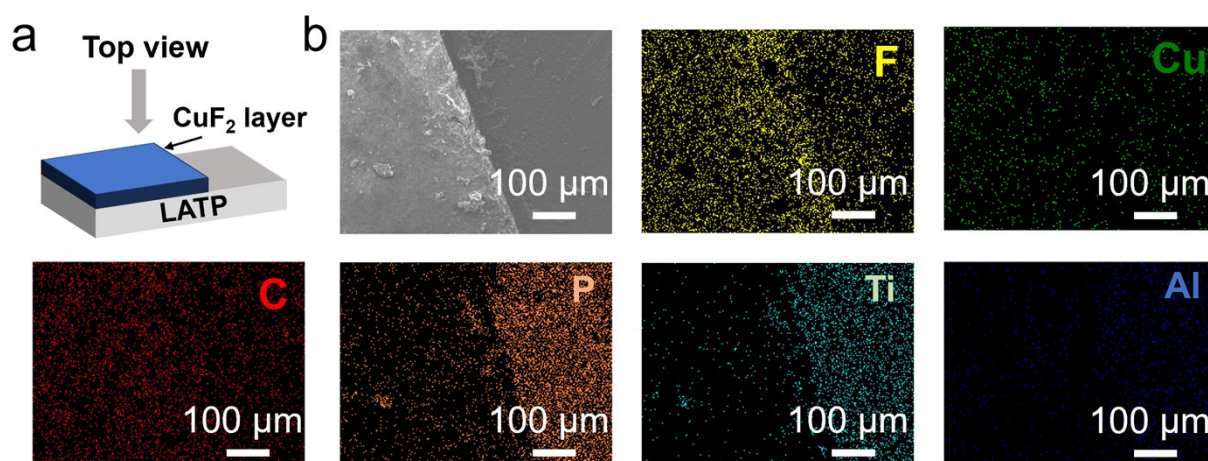

**Figure S13.** (a) Schematic illustration of  $\text{CuF}_2@$ LATP. (b) Surface SEM and corresponding EDS mapping images of  $\text{CuF}_2@$ LATP after 100 cycles.

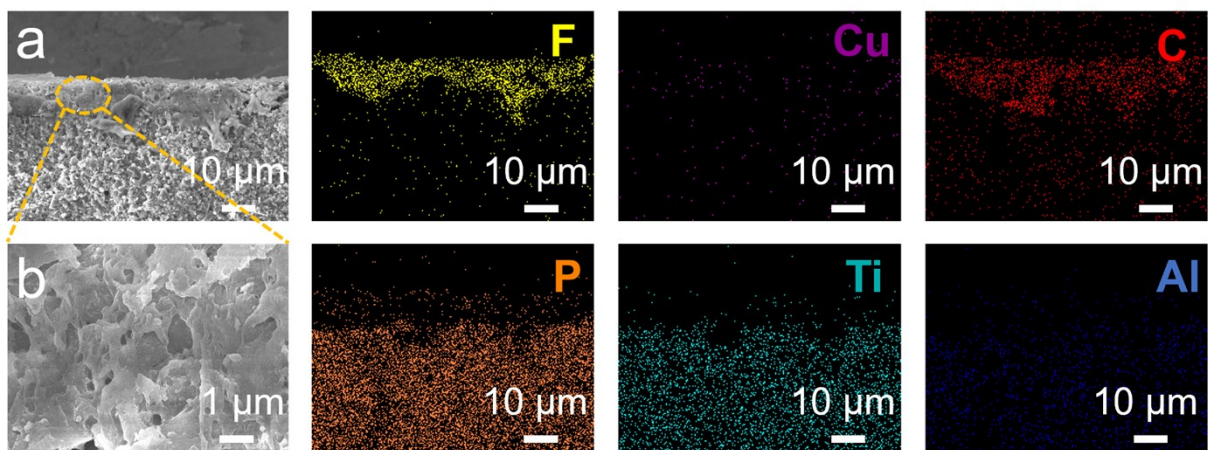

**Figure S14.** (a) Cross-sectional SEM and corresponding EDS mapping images of  $\text{CuF}_2@LATP$  after 100 cycles. (b) Magnifying cross-sectional SEM image.

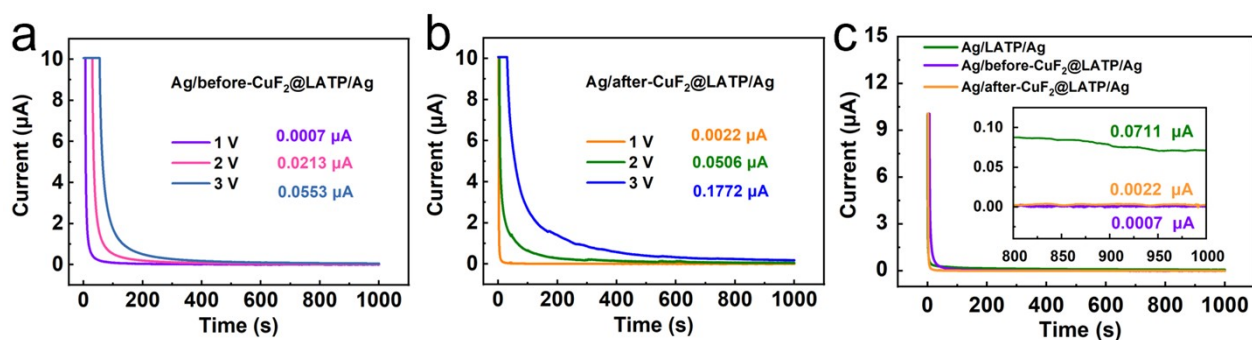

**Figure S15.** Chronoamperometry curves of (a)  $\text{Ag/before-CuF}_2@LATP/Ag$  and (b)  $\text{Ag/after-CuF}_2@LATP/Ag$  electrodes with instant applied external voltages of 1 V, 2 V, 3 V; Chronoamperometry curves of (c)  $\text{Ag/LATP/Ag}$ ,  $\text{Ag/before-CuF}_2@LATP/Ag$  and  $\text{Ag/after-CuF}_2@LATP/Ag$  electrodes with an instant applied external voltage of 1 V.

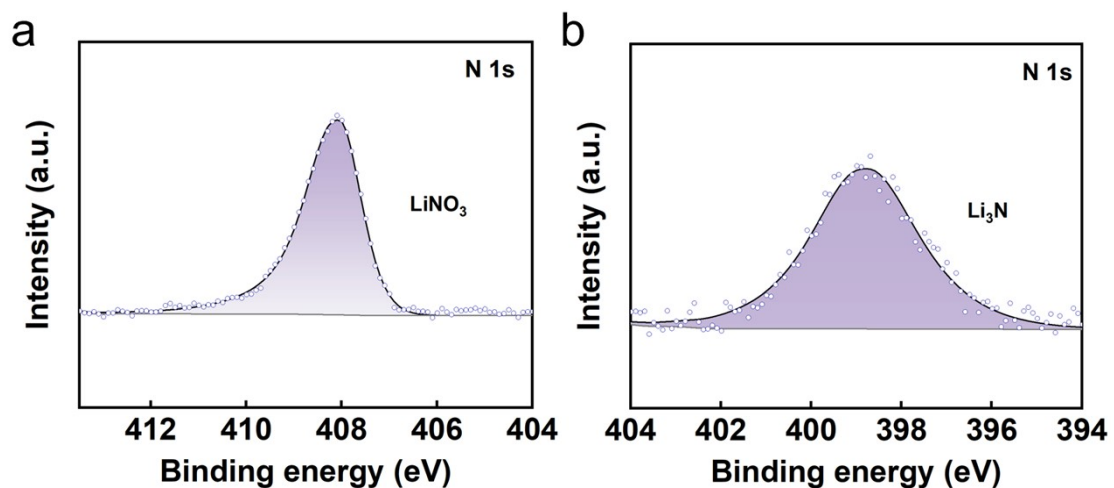

**Figure S16.** N 1s XPS spectra of  $\text{CuF}_2$ @LATP surface (a) before cycling and (b) after 100 cycles.

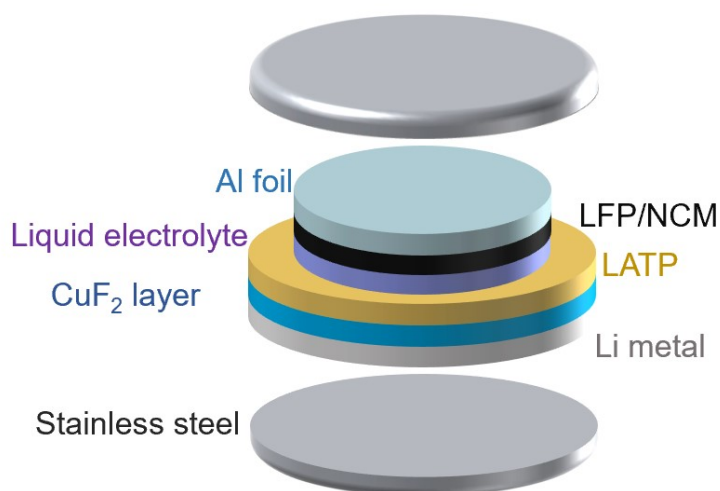

**Figure S17.** Full battery model.

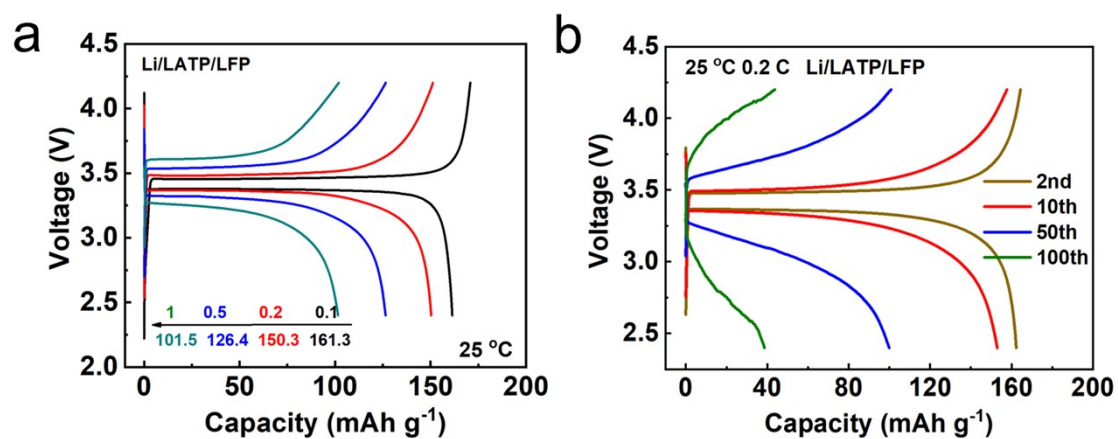

**Figure S18.** (a) Charge and discharge curves of Li/LATP/LFP full battery at different rates; (b) Charge and discharge curves of Li/LATP/LFP full battery at 0.2 C under different cycles.

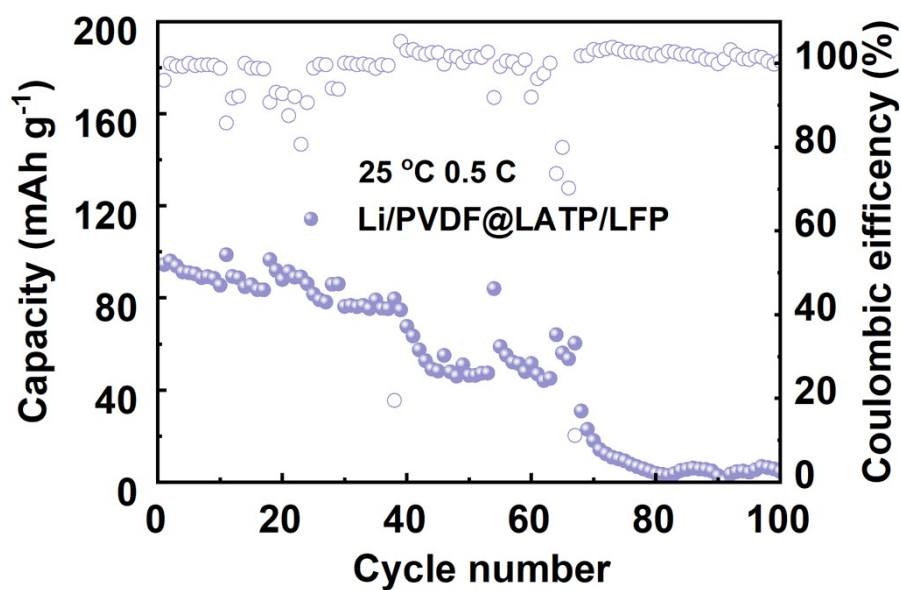

**Figure S19.** Cycling performance of the Li/PVDF@LATP/LFP full battery at 25 °C and 0.5 C.

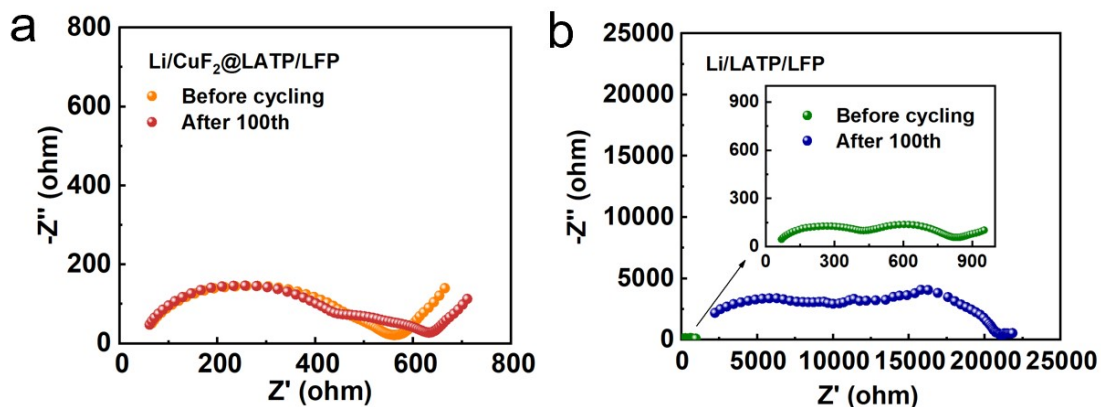

**Figure S20.** EIS curves of (a) Li/CuF<sub>2</sub>@LATP/LFP and (b) Li/LATP/LFP full batteries before cycling and after 100 cycles at 0.2 C.

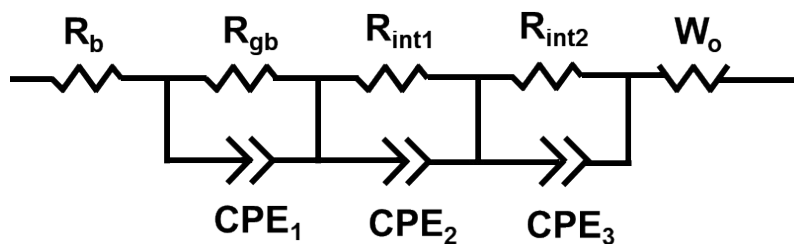

**Figure S21.** The equivalent circuit of full batteries.

The equivalent circuit of the full battery, where  $R_b$  represents the total resistance of the LATP, the intermediate layer, and the resistance of other components, including the electrode and the packaging material.  $R_{gb}$ ,  $R_{int1}$ ,  $R_{int2}$ , and  $W_o$  represent grain boundary resistance, interfacial resistance between positive electrode and electrolyte, interfacial resistance between negative electrode and electrolyte, and Warburg resistance, respectively.
